# Supplementary material for: Protein or ribonucleoprotein-mediated blocking of recombinase polymerase amplification enables the discrimination of nucleotide and epigenetic differences between cell populations
Source: PubMed Central journal article supplement (PMC8376914; doi:10.1038/s42003-021-02503-5), 2021-08-19
Supplement: 42003_2021_2503_MOESM2_ESM.pdf [file 42003_2021_2503_MOESM2_ESM.pdf]

## **Supplementary Information**

**Protein or ribonucleoprotein-mediated blocking of recombinase polymerase amplification enables the discrimination of nucleotide and epigenetic differences between cell populations**

Toshitsugu Fujita, Shoko Nagata, Hodaka Fujii

**Supplementary Table 1. Oligonucleotides used in this study**

| Categories  | Name                         | Sequence (5' → 3')                                              | Experiments                                                                                           | Number |
|-------------|------------------------------|-----------------------------------------------------------------|-------------------------------------------------------------------------------------------------------|--------|
| ORN         | ORN_KRAS                     | guggcguaggcaagagugc                                             | Figure 2c–2e, and 2g, and Supplementary Figure 1                                                      | -      |
| ORN         | ORN_KRAS_mut                 | gucgcguaggcaagagugc                                             | Figure 2d and 2e                                                                                      | -      |
| ORN         | ORN_KRAS#2                   | cugguggcguaggcaagag                                             | Figure 2g                                                                                             | -      |
| ORN         | ORN_KRAS#3                   | guaguuggagcuggugcgcu                                            | Supplementary Figure 2b and 2c                                                                        | -      |
| ORN         | ORN_p16                      | gcggccggggucggguaga                                             | Figure 2c                                                                                             | -      |
| ORN         | ORN_cPax5_Ex1B               | cgacccguuugcagcaaugc                                            | Figure 2c                                                                                             | -      |
| crRNA       | gRNA_KRAS                    | guaguuggagcuggugcgcuuuuuagagcuaugcuguuuug                       | Figure 3b and 3c, and Supplementary Figures 3c, 4d, and 5b                                            | -      |
| crRNA       | gRNA_KRAS#2                  | cuugugguaguuggagcugguuuuagagcuaugcuguuuug                       | Figure 3b and 3c, and Supplementary Figure 6a and 6c                                                  | -      |
| crRNA       | gRNA_KRAS#3                  | aaacuugugguaguuggagcugguuuuagagcuaugcuguuuug                    | Supplementary Figure 4b                                                                               | -      |
| crRNA       | gRNA_KRAS_mut                | guaguuggagcuggugcgcuuuuuagagcuaugcuguuuug                       | Figure 3e and Supplementary Figure 4d                                                                 | -      |
| crRNA       | gRNA_hp16_Gx5#2              | acggcccgccggggucguuuuuagagcuaugcuguuuug                         | Figure 3b and 3c, and Supplementary Figures 4d and 5b                                                 | -      |
| crRNA       | gRNA_mid2                    | caccuccucuaccggacccguuuuuagagcuaugcuguuu                        | Figure 3i                                                                                             | -      |
| tracrRNA    | -                            | aaacagcauagcaaguuaaaauaaggcuaguccguuaucacuuaagggcaccgagucggugcu | Figure 3b, 3c, 3e, 3i, and Supplementary Figures 3c, 4b, 4d, 5b, 6a, and 6c                           | -      |
| ODN_2'3'ddC | ODN_KRAS_ddC                 | tcttgectacgccaccagctccaac                                       | Supplementary Figure 12c and 12d                                                                      | 28759  |
| Primer      | KRAS-RPA-G12-F               | tagtgattaacctatgtgtgacatgttcta                                  | Figures 2c–e, 2g, 3b, 3c, and 3e, and Supplementary Figures 1, 2b, 2c, 3b, 3c, 4b, 4d, 6a, 6c, and 8d | 28318  |
| Primer      | KRAS-RPA-G12-R               | aaacaagattacctctattgttgatcatattc                                | Figures 2c–e, 2g, 3b, 3c, and 3e, and Supplementary Figures 1, 2b, 2c, 3b, 3c, 4b, 4d, 6a, 6c, and 8d | 28319  |
| Primer      | hKRAS-G12G13-F               | ggtgagttgtattaaaagtactgg                                        | Supplementary Figure 12c and 12d                                                                      | 28685  |
| Primer      | hKRAS_G12G13_antisense_clamp | ttagctgtatcgtcaaggcactc                                         | Supplementary Figure 12c and 12d                                                                      | 28760  |
| Primer      | p16-RPA-F2                   | ggcggcggggagcagcatggagcctcggctgac                               | Figure 3i, and Supplementary Figures 5b and 7a                                                        | 28315  |
| Primer      | p16-RPA-R2                   | ctaccacctggatcgccctccgaccgtaactat                               | Figure 3i, and Supplementary Figures 5b and 7a                                                        | 28316  |
| Primer      | p16-RPA-F                    | gaggaagaaagaggaggggctgctggtcacc                                 | Supplementary Figure 10b and 10d                                                                      | 28313  |
| Primer      | p16-RPA-R                    | ctgcagaccctctaccacctggatcggcctc                                 | Supplementary Figure 10b                                                                              | 28314  |
| Primer      | hCDKN2A(-)Bisul-R2           | tgcagaccctctaccacctggat                                         | Supplementary Figure 10d                                                                              | 27477  |
| Primer      | p14-RPA-F                    | gtcccagtctgcagttaagggggcaggagt                                  | Figure 4c and 4f, and Supplementary Figure 9a                                                         | 28354  |
| Primer      | p14-RPA-R                    | gggccttctactgtctcttaggaa                                        | Figure 4c and 4f, and Supplementary Figure 9a                                                         | 28355  |
| Primer      | Pax5-LexA-RPA-F              | gcatcagtcgccctcgcctcctctctcg                                    | Supplementary Figure 8b and 8c                                                                        | 28467  |
| Primer      | Pax5-LexA-RPA-R              | gcgaggcgggaacgtgactttgccctcgg                                   | Supplementary Figure 8b and 8c                                                                        | 28468  |
| Primer      | EGFR-RPA-L858-F              | tggcagccaggaatgtactggtgaaaactgcagcatg                           | Supplementary Figure 13d                                                                              | 28364  |
| Primer      | EGFR-RPA-L858-R3             | cagaatgtctggagagcatcctcccctgcatg                                | Supplementary Figure 13d                                                                              | 28368  |

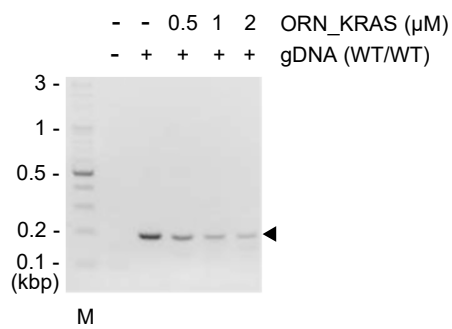

**Supplementary Figure 1. ORNi-RPA with various doses of an ORN.** The human *KRAS* gene was amplified from 293T gDNA (WT/WT *KRAS*) in the presence of various doses of ORN\_KRAS. 0.5–2  $\mu$ M of the ORN moderately suppressed *KRAS* amplification. M, molecular weight marker.

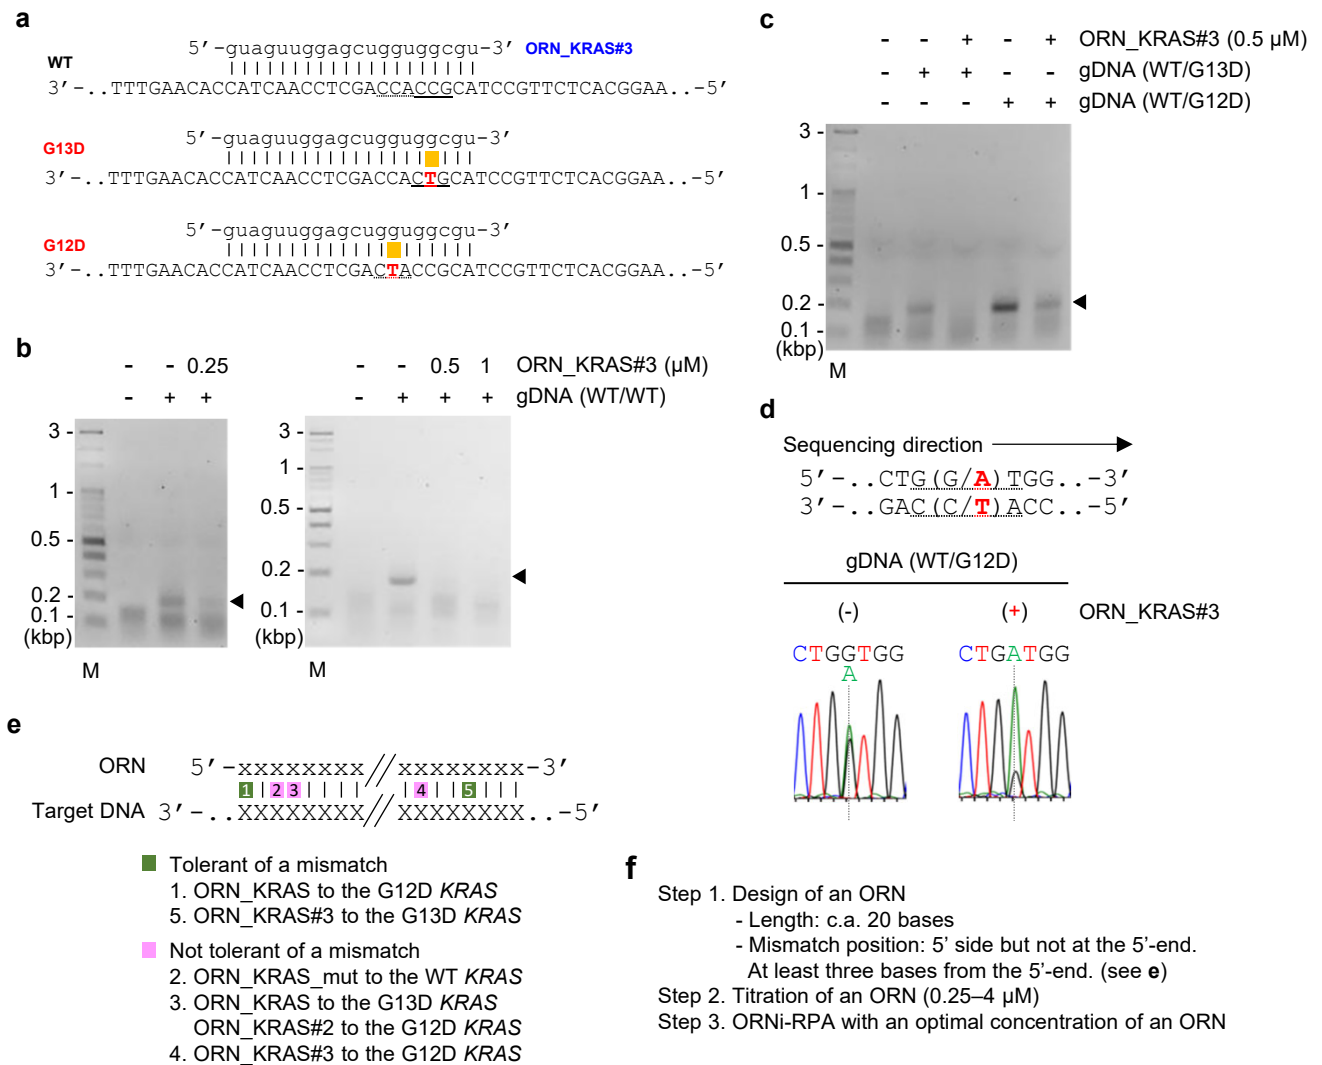

### Supplementary Figure 2. Discrimination of a single-nucleotide mutation by ORNi-RPA.

(a) An ORN examined as a sequence-specific blocking agent and its complementary sequence in the human *KRAS* gene. (b) ORNi-RPA with different doses of an ORN. 293T gDNA (WT/WT *KRAS*) was used as a template. M, molecular weight marker. (c) Results of ORNi-RPA of HCT116 gDNA (WT/G13D *KRAS*) and a commercially available gDNA (WT/G12D *KRAS*). (d) DNA sequencing analysis of ORNi-RPA products. RPA and ORNi-RPA products in c were purified and sequenced using a forward primer. (e) Summary of tolerance of nucleotide mismatches between ORNs and target DNA. (f) A potential step-by-step procedure for ORNi-RPA.

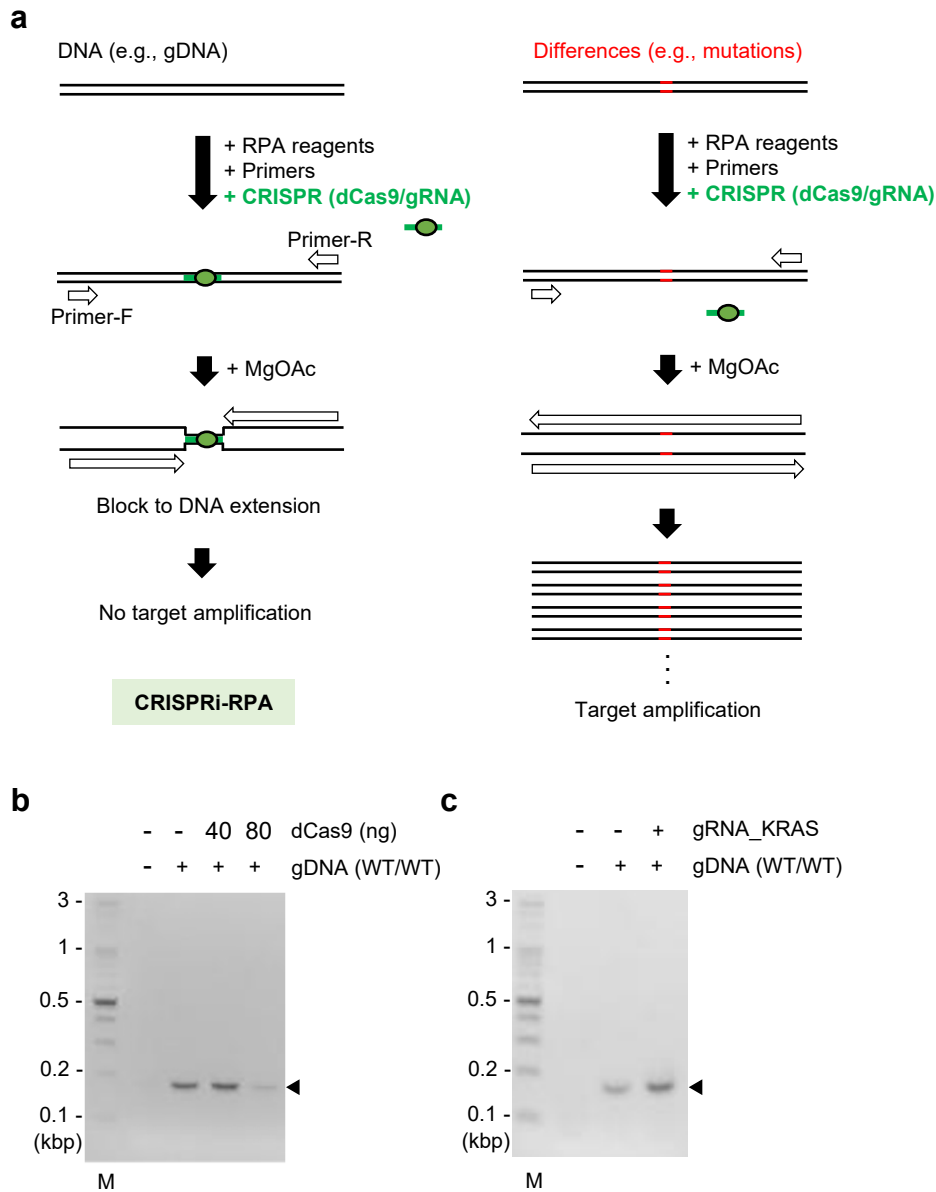

**Supplementary Figure 3. Sequence-specific suppression of RPA reactions by CRISPRi.**

(a) Schematic diagram showing sequence-specific suppression of RPA reactions by CRISPRi (CRISPRi-RPA). In CRISPRi-RPA, dCas9 plus gRNA block DNA extension by the DNA polymerase, resulting in the suppression of DNA amplification across a gRNA target sequence. If a gRNA target sequence is mutated (substitution, insertion, or deletion), dCas9 plus gRNA cannot bind to the mutated sequence, which allows DNA amplification to proceed. (b) RPA reactions in the presence of only dCas9. The human *KRAS* gene was amplified from 293T gDNA (WT/WT *KRAS*). RPA reactions were not inhibited in the presence of 40 ng of dCas9 so this dose was adopted in all CRISPRi-RPA experiments. M, molecular weight marker. (c) RPA reactions in the presence of gRNA alone. The human *KRAS* gene was amplified from 293T gDNA. RPA reactions were not inhibited in the presence of gRNA alone (10 nM in an RPA reaction mixture).

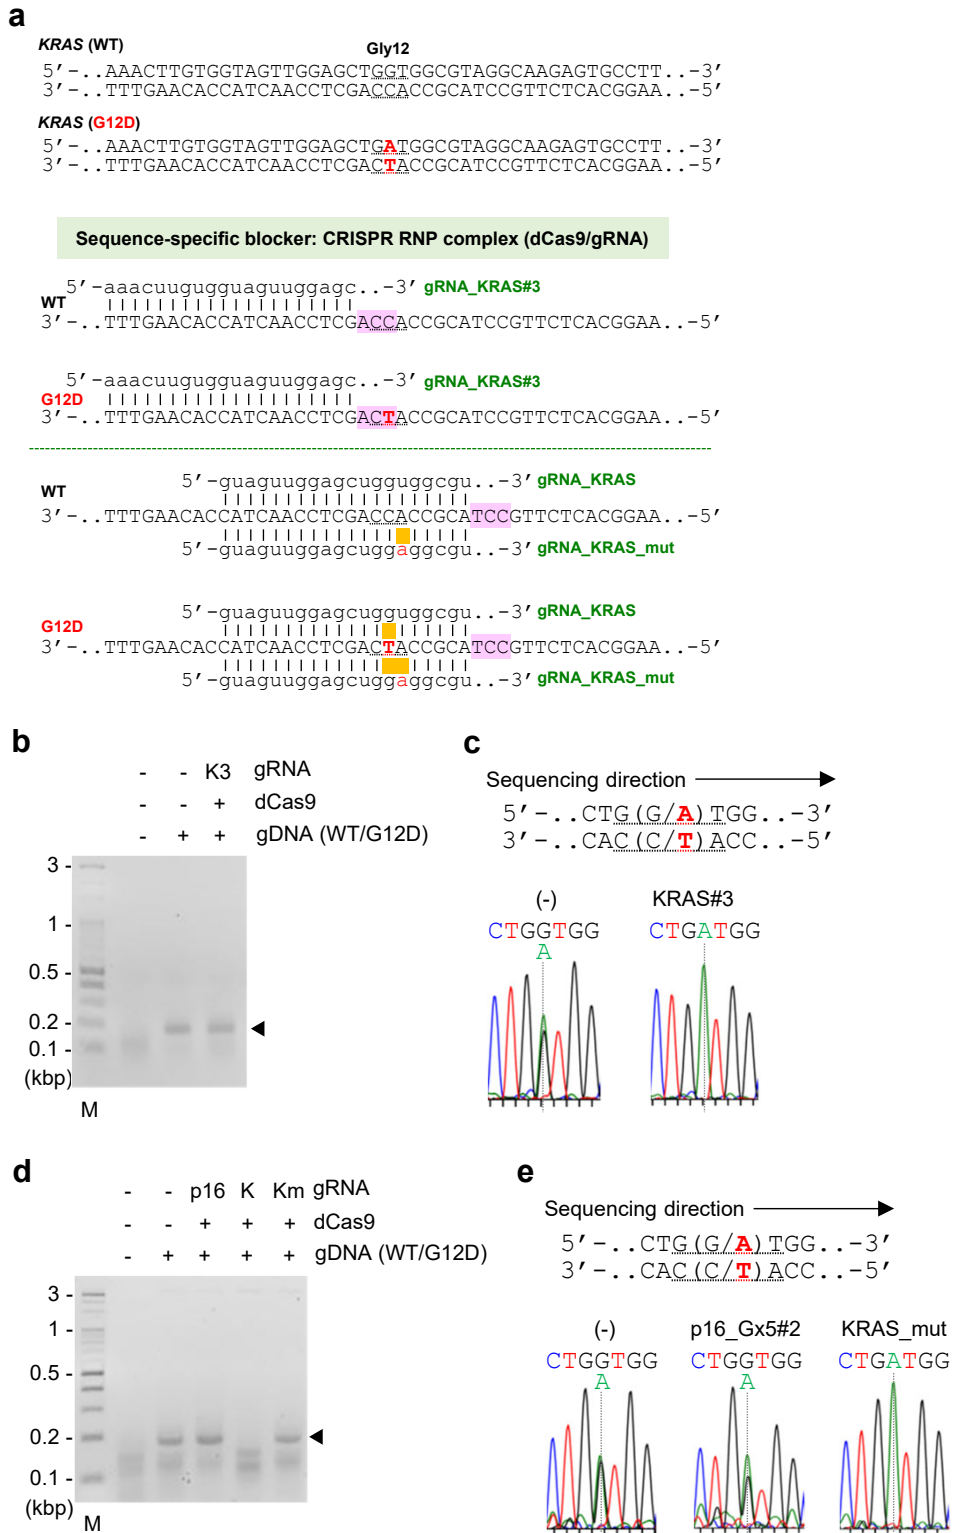

**Supplementary Figure 4. Discrimination of the G12D *KRAS* mutation by CRISPRi-RPA.** (a) gRNAs and their target sequences in the human *KRAS* gene. (b and d) Results of CRISPRi-RPA of a commercially available gDNA (WT/G12D *KRAS*). Amplified *KRAS* is indicated by an arrowhead. M, molecular weight marker. (c and e) DNA sequencing analysis of CRISPRi-RPA products. RPA and CRISPRi-RPA products from b and d were purified and sequenced using a forward primer.

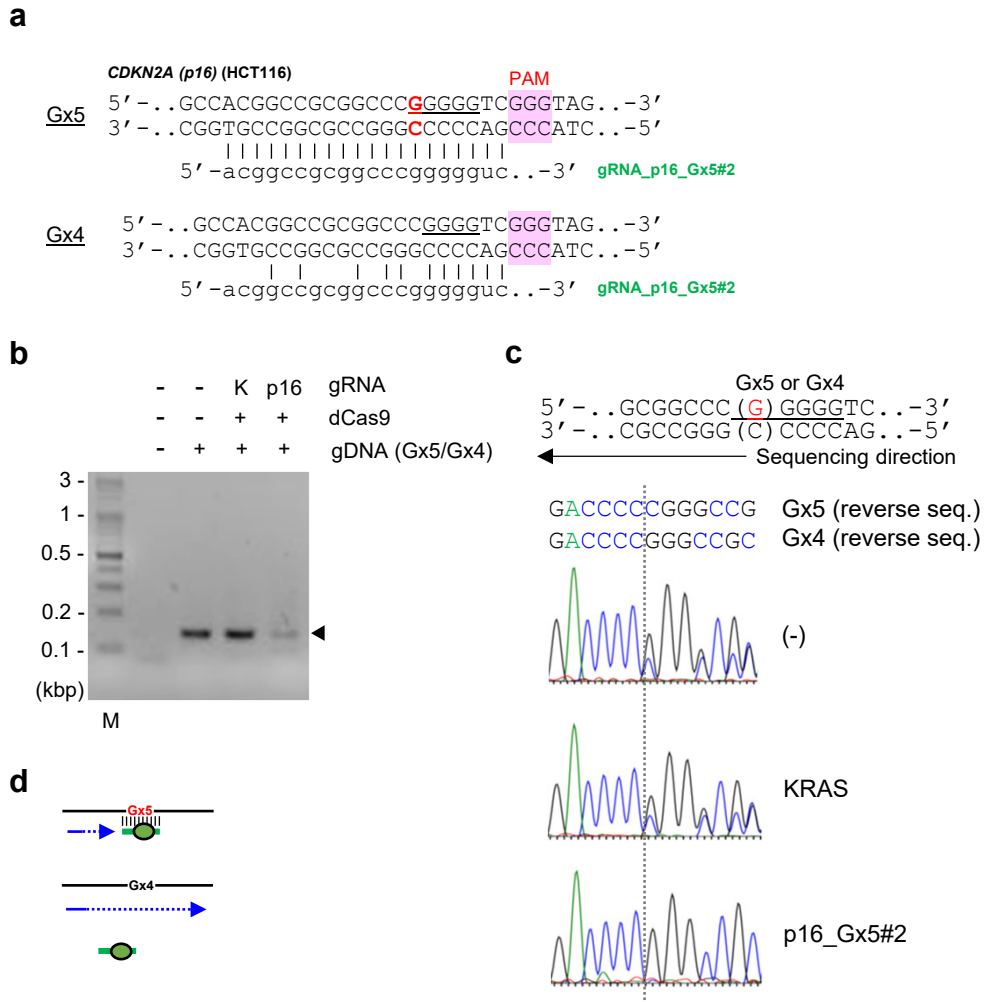

**Supplementary Figure 5. Discrimination of a single-nucleotide insertion/deletion by CRISPRi-RPA.** (a) The target DNA sequence in the *CDKN2A (p16)* gene in HCT116 cells. A single guanine is inserted in the *CDKN2A (p16)* gene in one allele (shown as Gx5). Forward and reverse sequences of the gene are shown. (b) Results of CRISPRi-RPA. The *CDKN2A (p16)* gene was amplified from HCT116 gDNA. M, molecular weight marker. (c) Results of DNA sequencing analysis. RPA and CRISPRi-RPA products in **b** were purified and sequenced using a reverse primer. (d) A model to show how CRISPRi-RPA discriminates single-guanine mutations in the *CDKN2A (p16)* gene.

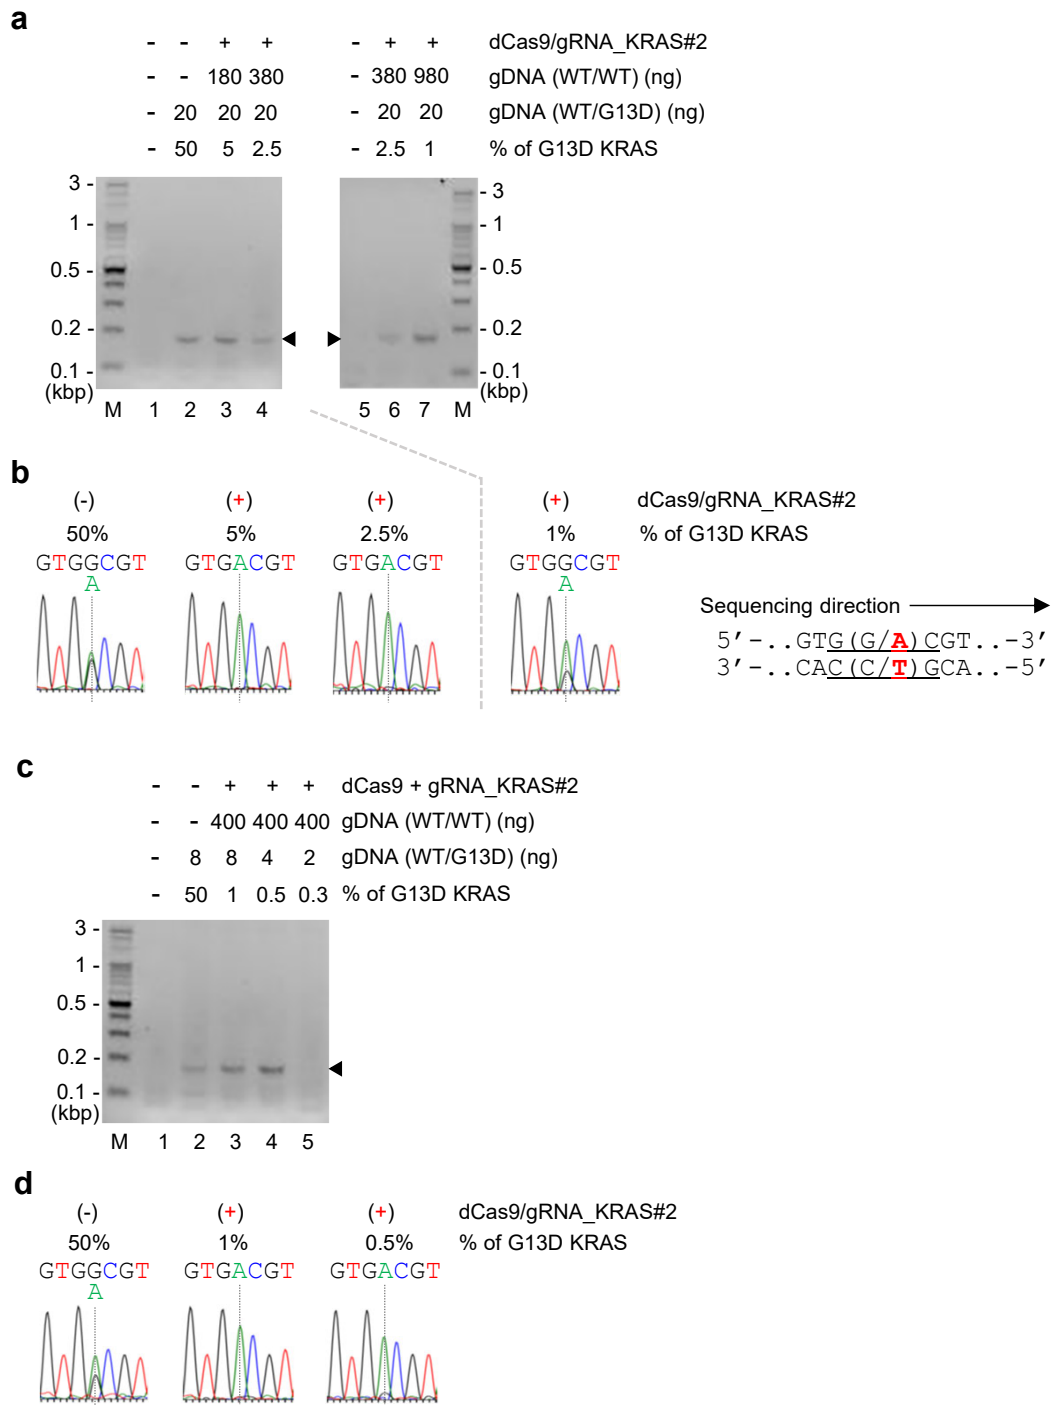

**Supplementary Figure 6. Sensitivity of CRISPRi-RPA.** (a and c) Results of CRISPRi-RPA of the human *KRAS* gene. Various doses of 293T gDNA (WT/WT *KRAS*) and HCT116 gDNA (WT/G13D *KRAS*) were mixed so that the G13D *KRAS* accounted for 5–0.3% of the total *KRAS*. These gDNA mixtures were used for RPA in the presence or absence of dCas9/gRNA\_KRAS#2. M, molecular weight marker. (b and d) Results of DNA sequencing analysis of the RPA or CRISPRi-RPA amplicons shown in a and c.



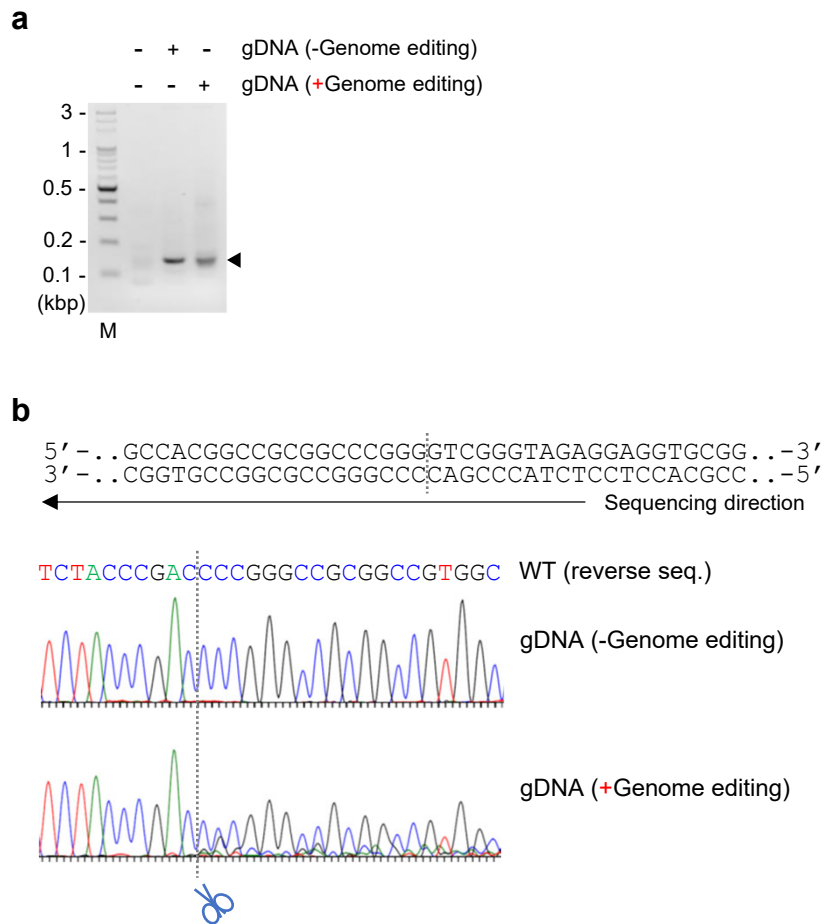

**Supplementary Figure 7. RPA with gDNA extracted from genome-edited 293T cells.** (a) Results of RPA. The human *CDKN2A* (*p16*) gene was amplified from gDNA extracted from parental and genome-edited 293T cells. M, molecular weight marker. (b) Results of DNA sequencing analysis. RPA products in a were purified and sequenced using a reverse primer.

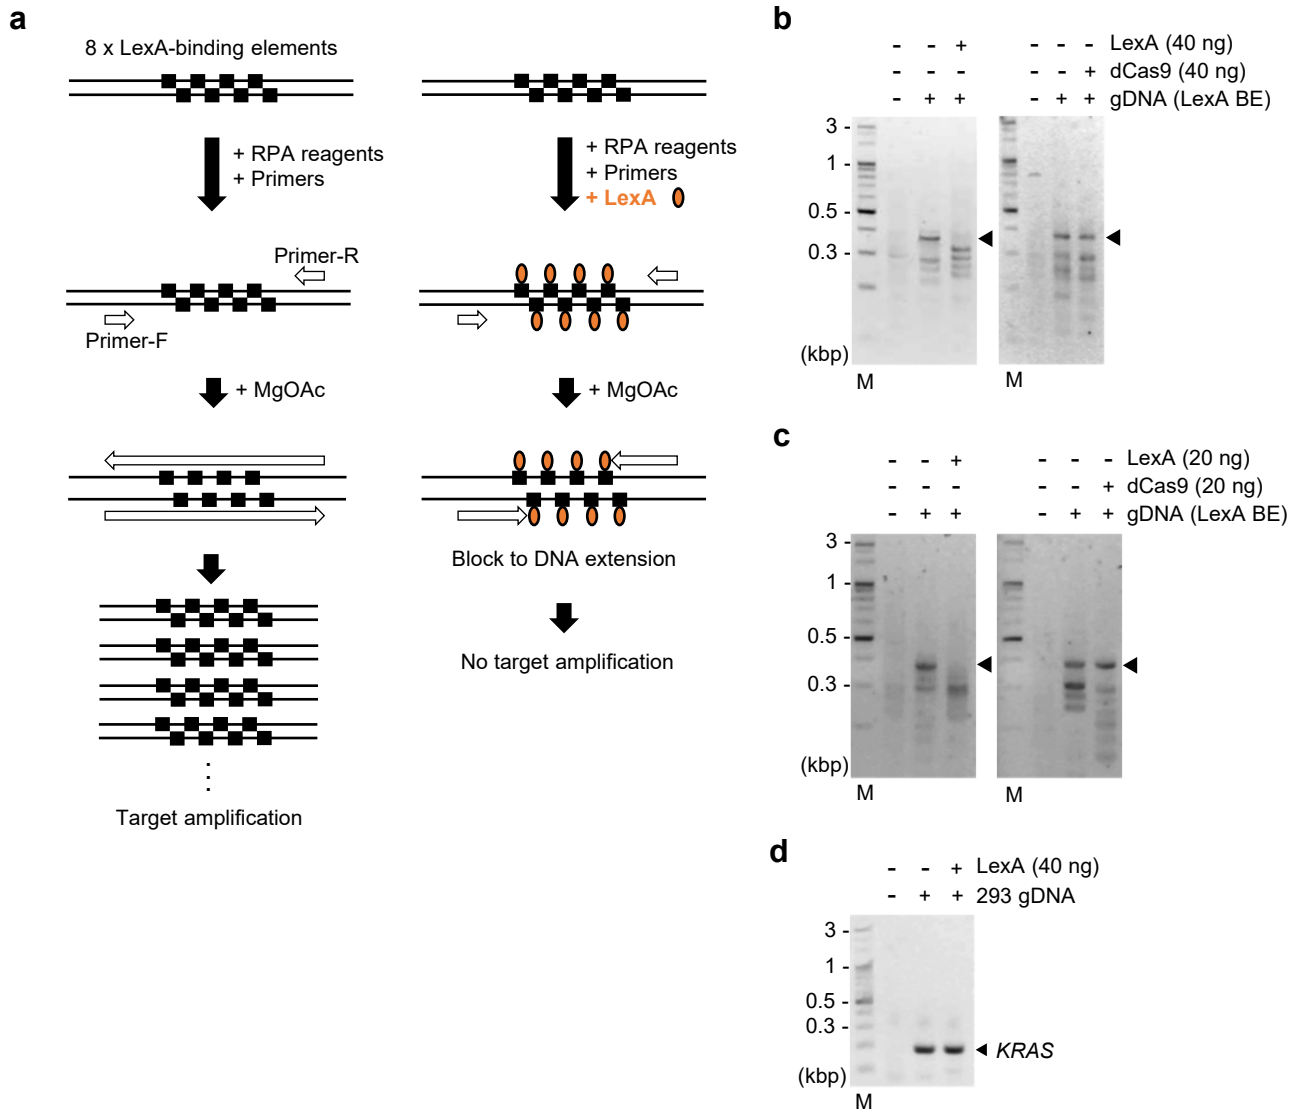

**Supplementary Figure 8. Suppression of RPA reactions by a sequence-specific DNA-binding protein.** (a) Schematic diagram showing sequence-specific suppression of RPA reactions by the bacterial DNA-binding protein LexA. RPA amplifies a DNA sequence including 8 copies of LexA-binding elements (LexA BE). In the presence of LexA, DNA polymerases are blocked by LexA binding to LexA BE, resulting in the suppression of amplification. (b–d) Results of RPA in the presence of LexA or dCas9. The DNA sequence including 8 copies of LexA BE was amplified from DT40#205-2 gDNA (b and c). Alternatively, the human *KRAS* gene was amplified as an irrelevant sequence from 293T gDNA (d). dCas9 was used as a negative control protein. M, molecular weight marker.

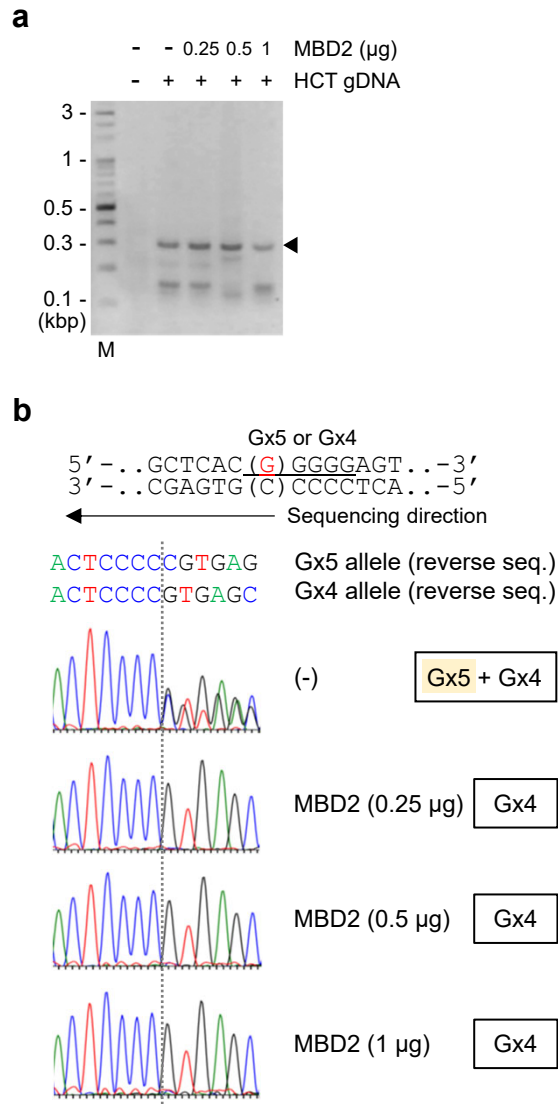

**Supplementary Figure 9. MBDi-RPA on the human *CDKN2A* (*p14ARF*) gene.** (a) Results of MBDi-RPA with various doses of MBD2 proteins. The human *CDKN2A* (*p14ARF*) gene was amplified. M, molecular weight marker. (b) DNA sequencing analysis of MBDi-RPA products. MBDi-RPA products in a were purified and sequenced using a reverse primer.

**a**

**CDKN2A (p16) (HCT116)**

CAC**CGGAGGAAGAAAGAGGAGGGGCTGGCTGCTCACC**AGAGGGTGGGG**CGGACCGCGTGC**  
T**CGCGCGCTGCG**GAGAGGGGGAGAGCAGGCAG**CGGGCGCGGGGAGCAGCATGGAGCCGGCG**  
G**CGGGGAGCAGCATGGAGCCTT**CGGCTGACTGGCTGGCCA**CGGC**CGCGGCC**CGGGT**CGGGT  
AGAGGAGGT**CGGGCGCTGCTGGAGGCGGGGGCGCTGCCCAA**CGCAC**CGAATAGTTACGGT**  
G**GAGGCCGATCCAGGTGGGTAGAGGGTCTGCAG**CGGGA

Gx4 allele (Methylated)

Gx5 allele (Unmethylated)

**b**

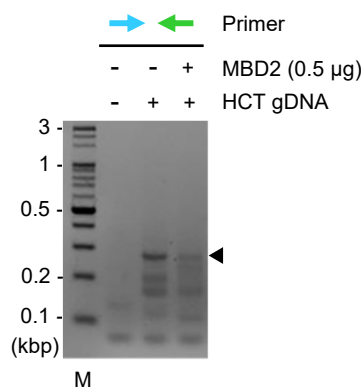

**c**

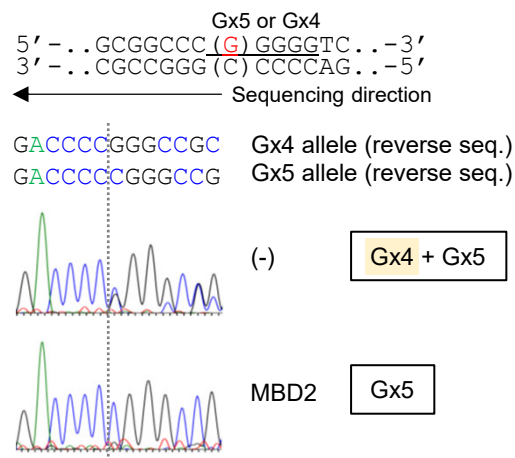

**d**

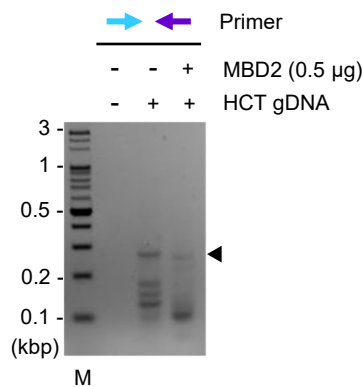

**e**

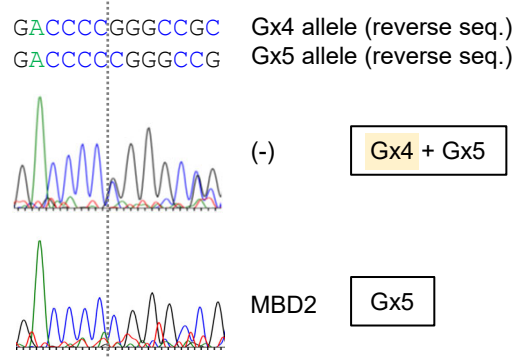

**Supplementary Figure 10. MBDi-RPA on the human *CDKN2A (p16)* gene. (a)** The target sequence and primer positions for the human *CDKN2A (p16)* gene in HCT116. Forward and reverse primer positions are highlighted in blue and green, respectively. Another reverse primer position is indicated by a purple square. **(b and d)** Results of MBDi-RPA. M, molecular weight marker. **(c and e)** Results of DNA sequencing analysis. RPA or MBDi-RPA amplicons shown in **b** and **d** were sequenced with a reverse primer.

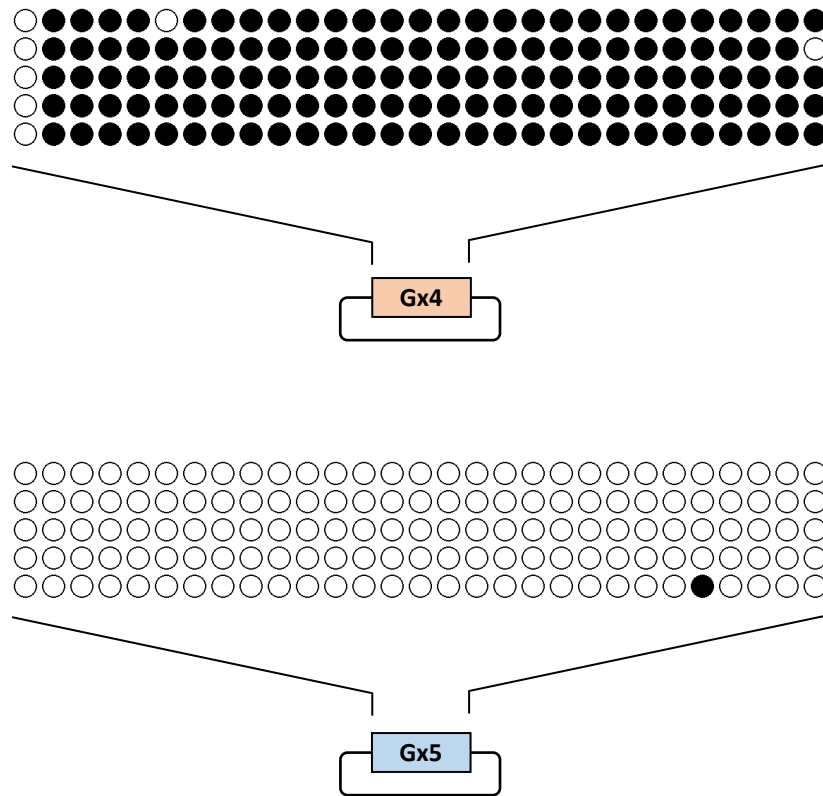

**Supplementary Figure 11. Results of bisulfite-sequencing.** The human *CDKN2A* (*p14ARF*) sequence shown in Figure 4b was amplified by PCR and then cloned into plasmids. The plasmid containing the Gx4 sequence was methylated by a CpG-methyltransferase *M.SssI* *in vitro* while the plasmid containing of the Gx5 sequence was mock-treated. To evaluate CpG-methylation status, the resultant plasmids were subjected to bisulfite-treatment. The *CDKN2A* (*p14ARF*) sequences were amplified from each plasmid by PCR, cloned, and sequenced. White circles show non-CpG-methylated sites whereas black circles show CpG-methylated sites.

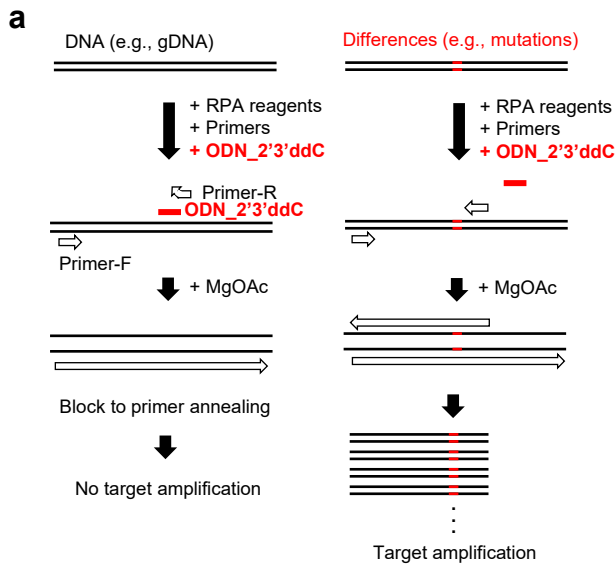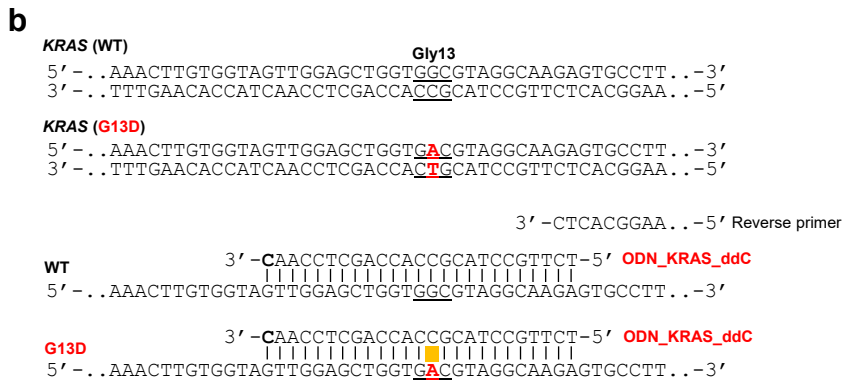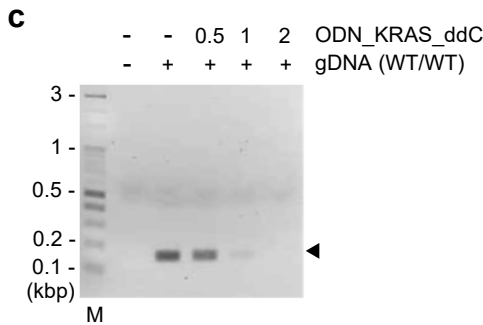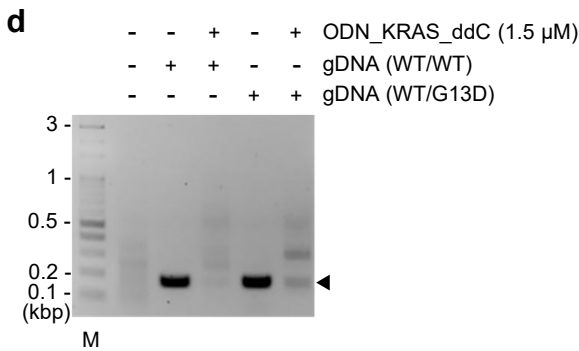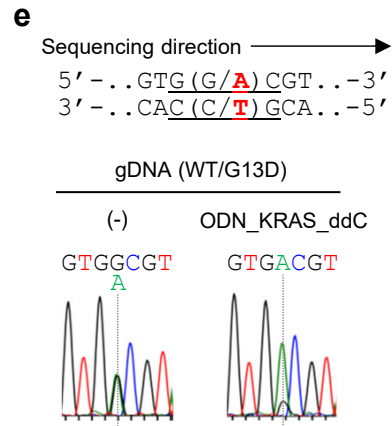

**Supplementary Figure 12. Discrimination of the G13D *KRAS* mutation by blocking RPA with a 3'-modified ODN.** (a) Schematic diagram showing blocking RPA with a 3'-modified ODN. In the presence of an ODN modified with 2'3'ddC at the 3'-end, annealing of a primer is inhibited, resulting in suppression of DNA amplification. If the target sequence is mutated, it cannot be recognized by the ODN and DNA amplification proceeds uninhibited (allowing the detection of a DNA mutation). (b) A 3'-modified ODN and its complementary sequences in the human *KRAS* gene. (c) Blocking RPA with various doses of a 3'-modified ODN. 293T gDNA (WT/WT *KRAS*) was used as a template. M, molecular weight marker. (d) Results of blocking RPA of 293T gDNA (WT/WT *KRAS*) and HCT116 gDNA (WT/G13D *KRAS*). (e) DNA sequencing analysis of blocking RPA products. RPA and blocking RPA products in **d** were purified and sequenced using a forward primer.

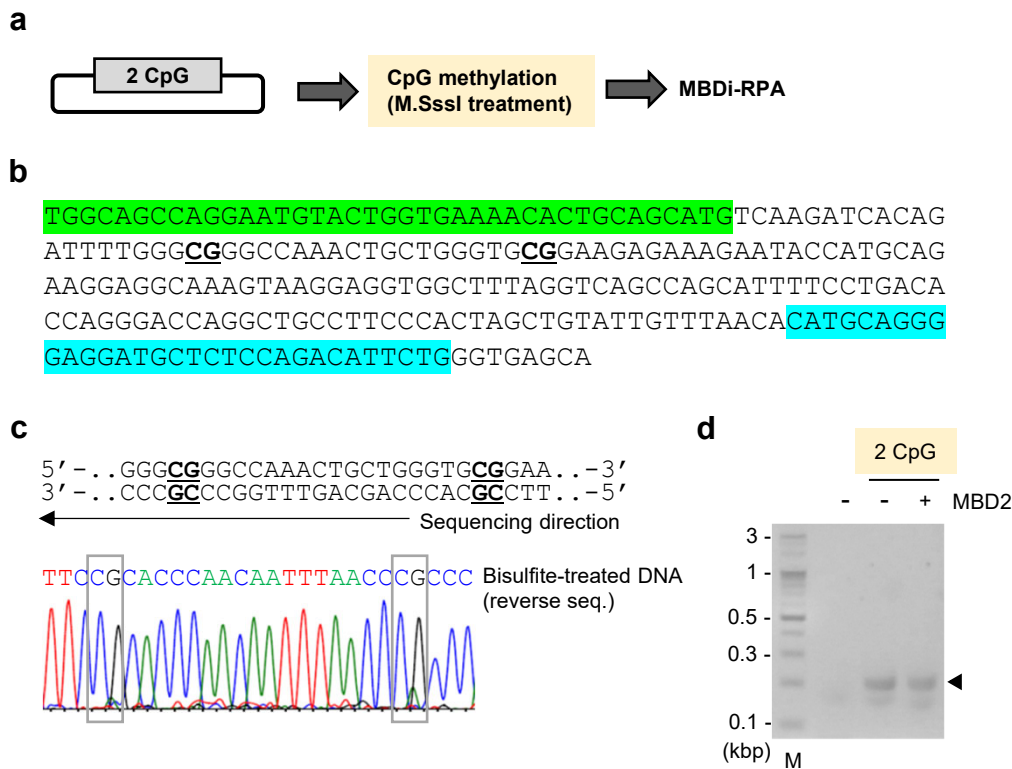

**Supplementary Figure 13. MBDi-RPA with template DNA containing two CpG sites.** (a) Schematic diagram showing *in vitro* CpG methylation followed by MBDi-RPA. A human *EGFR* sequence was cloned into a plasmid, CpG-methylated, and used for MBDi-RPA. (b) The human *EGFR* sequence cloned in a plasmid. Forward and reverse primer positions are shown in blue and green, respectively. (c) Results of bisulfite-sequencing analysis. To confirm *in vitro* methylation, the CpG-methylated plasmid was subjected to bisulfite treatment followed by PCR amplification. The amplicon was directly sequenced with a reverse primer. The CpG sites are shown in gray squares. (d) Results of MBDi-RPA. M, molecular weight marker.
